# Supplementary material for: Photo-induced glycosylation using the edible polyphenol curcumin
Source: Royal Society of Chemistry journal article supplement (doi:10.1039/d4ob00624k), 2024-01-01

**Supplementary information**

**Photo-induced glycosylation using the edible polyphenol curcumin**

Satomi Goi, Hidenari Shigeta, Daisuke Takahashi and Kazunobu Toshima\*

| <b>Contents</b>                    | <b>Page</b> |
|------------------------------------|-------------|
| <sup>1</sup> H NMR spectrum charts | S-2         |

## **$^1\text{H}$ NMR spectrum charts**

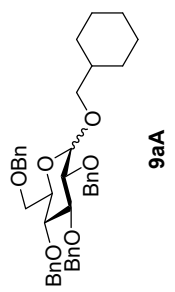

$^1\text{H}$  NMR spectrum of a mixture of **9aA $\alpha$** :**9aA $\beta$**  = 32:68 (Table 1, entry 11)

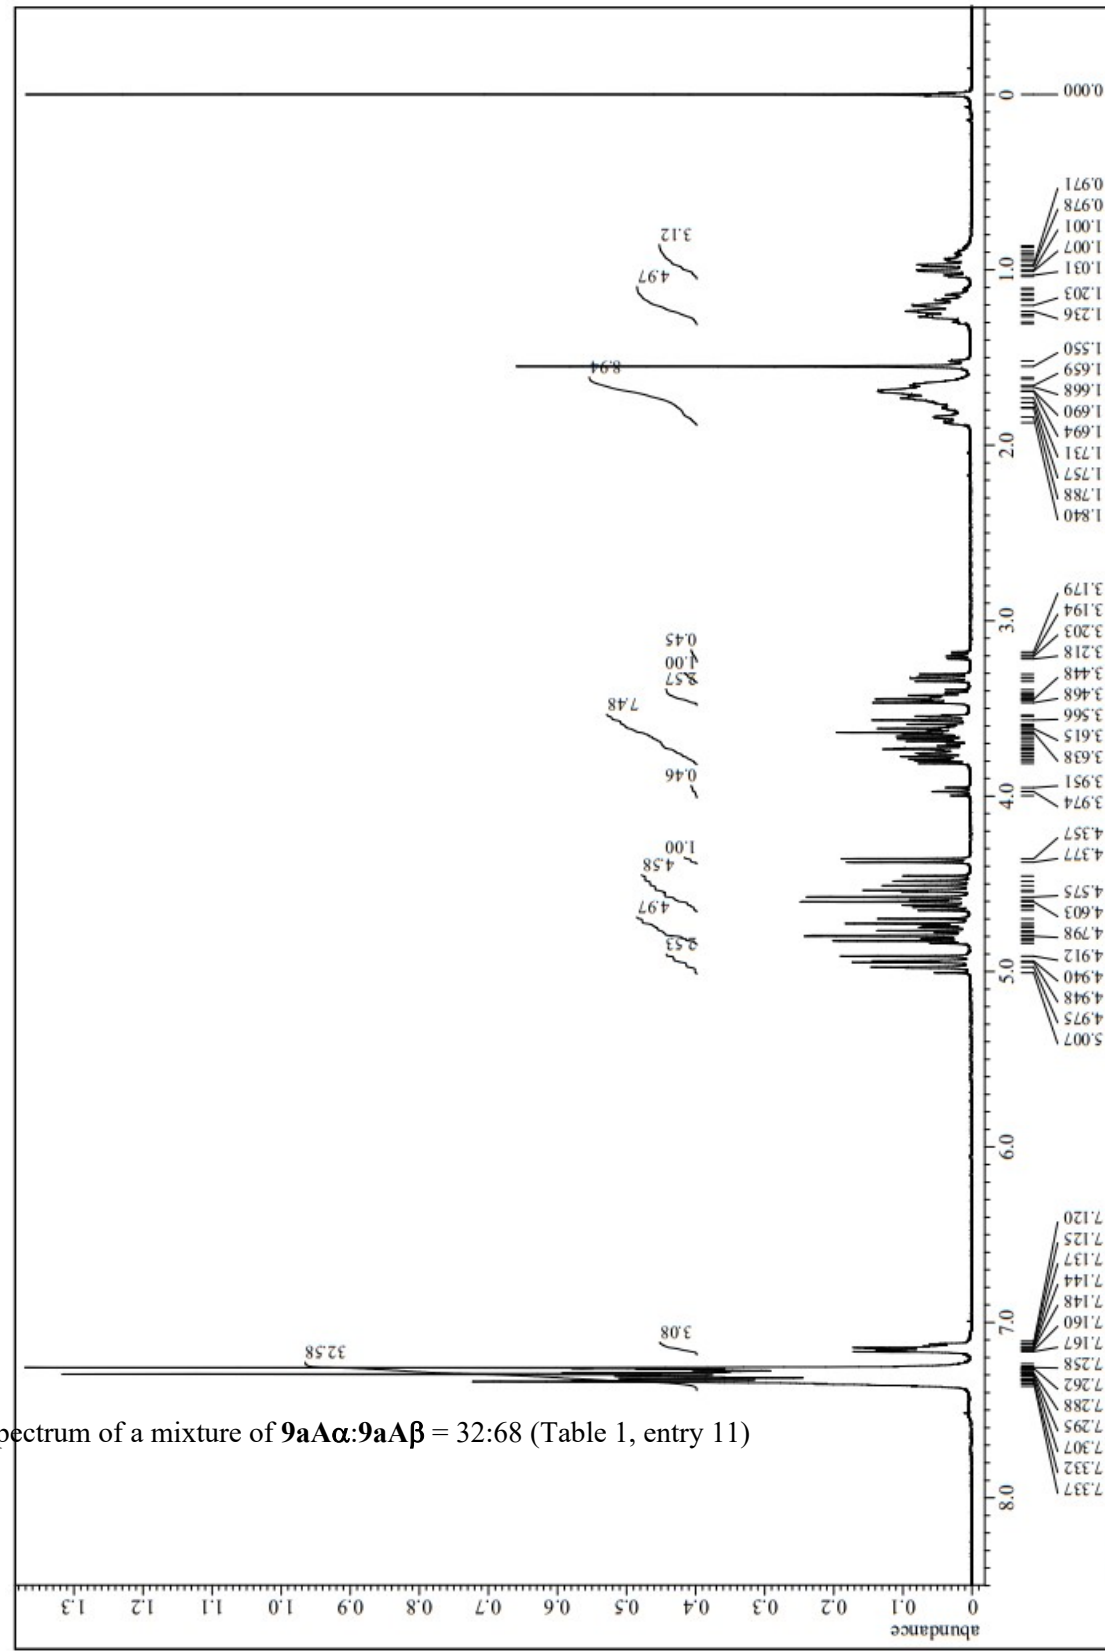

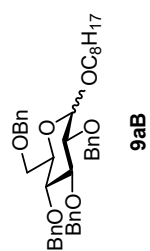

$^1\text{H}$  NMR spectrum of a mixture of **9aB $\alpha$** :**9aB $\beta$**  = 49:51 (Table 2, entry 1)

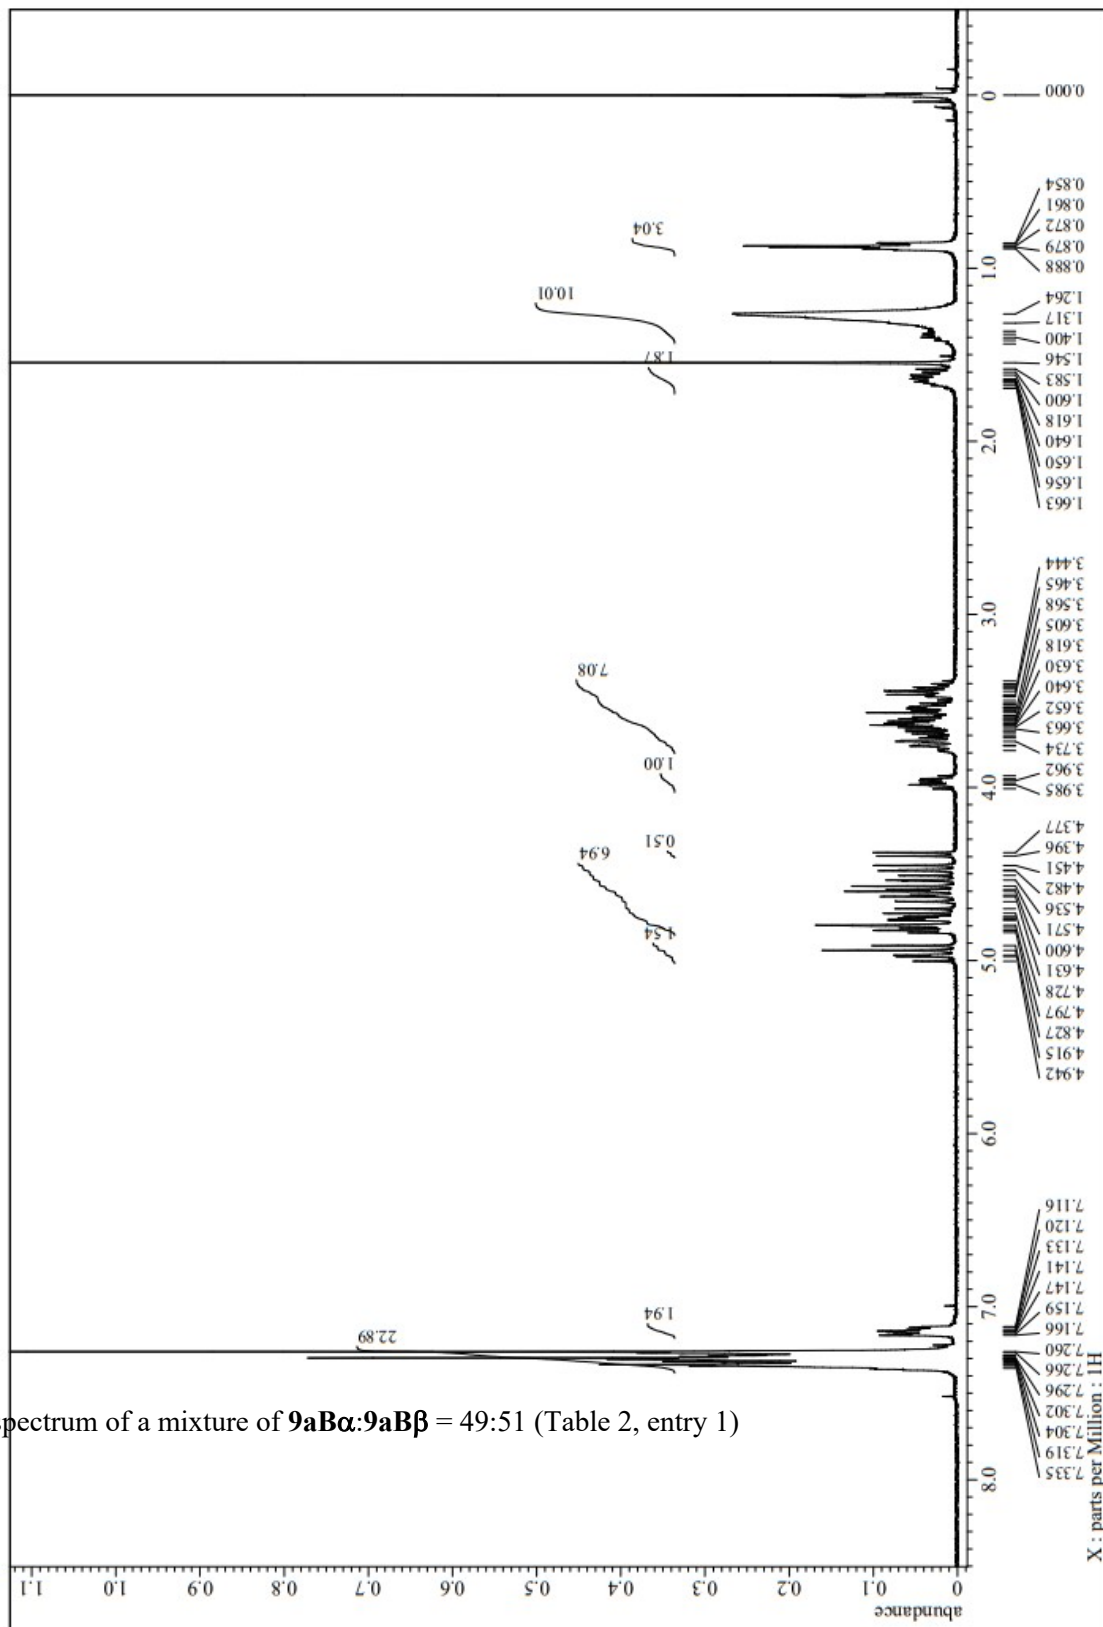

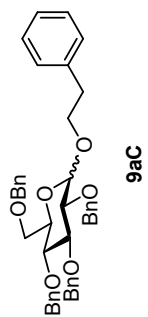

$^1\text{H}$  NMR spectrum of a mixture of **9aC $\alpha$** :**9aC $\beta$**  = 44:56 (Table 2, entry 2)

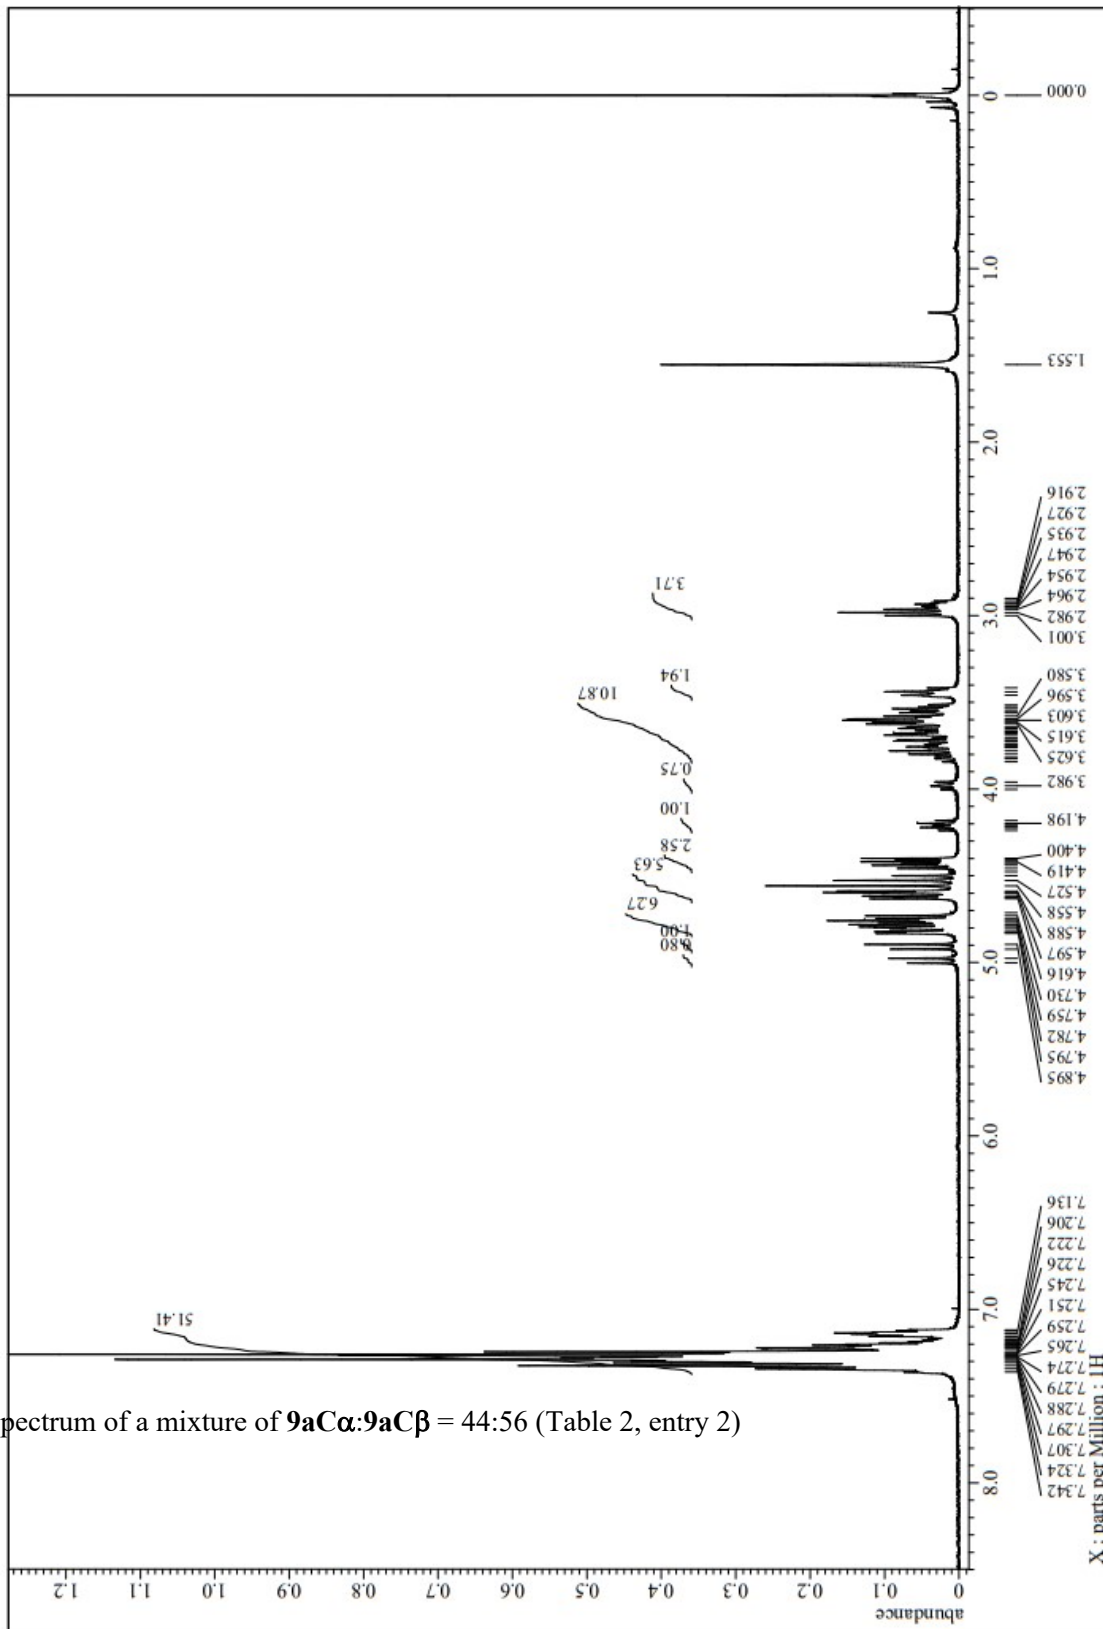

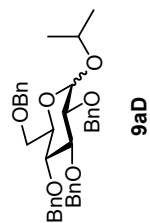

<sup>1</sup>H NMR spectrum of a mixture of **9aD $\alpha$** :**9aD $\beta$**  = 57:43 (Table 2, entry 3)

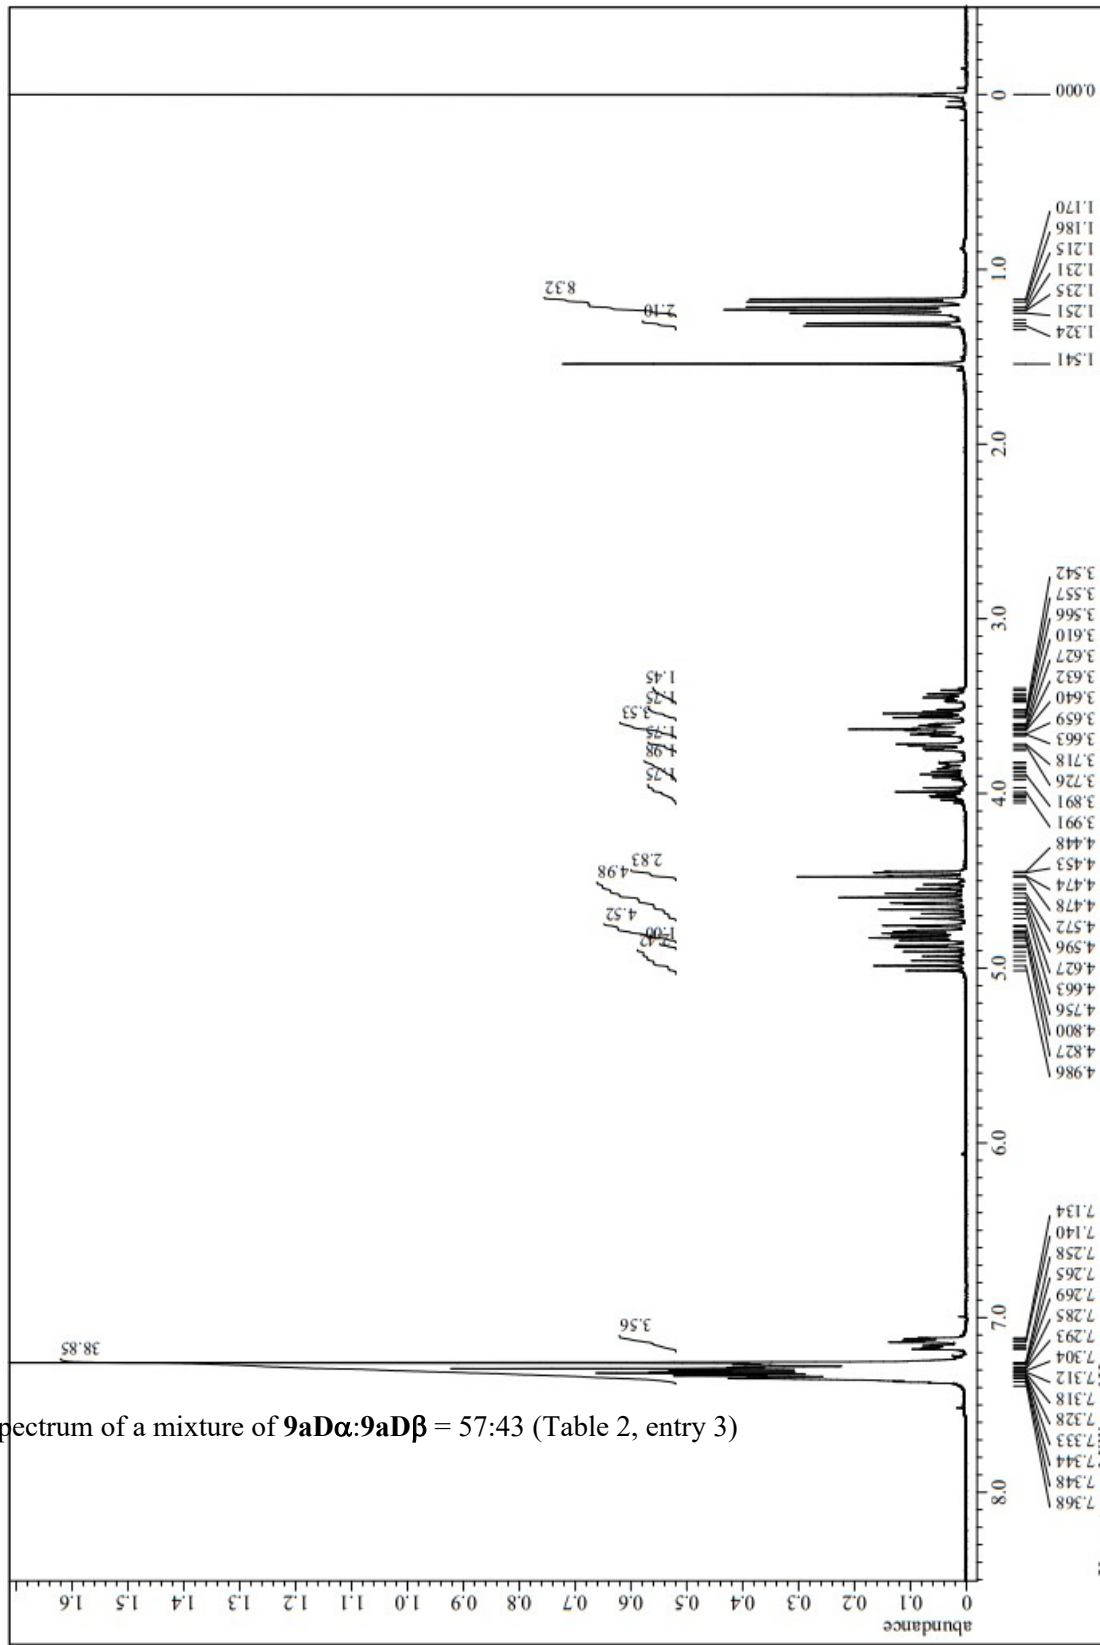

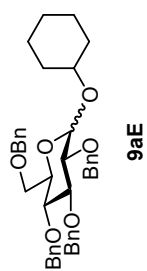

$^1\text{H}$  NMR spectrum of a mixture of **9aE** $\alpha$ :**9aE** $\beta$  = 52:48 (Table 2, entry 4)

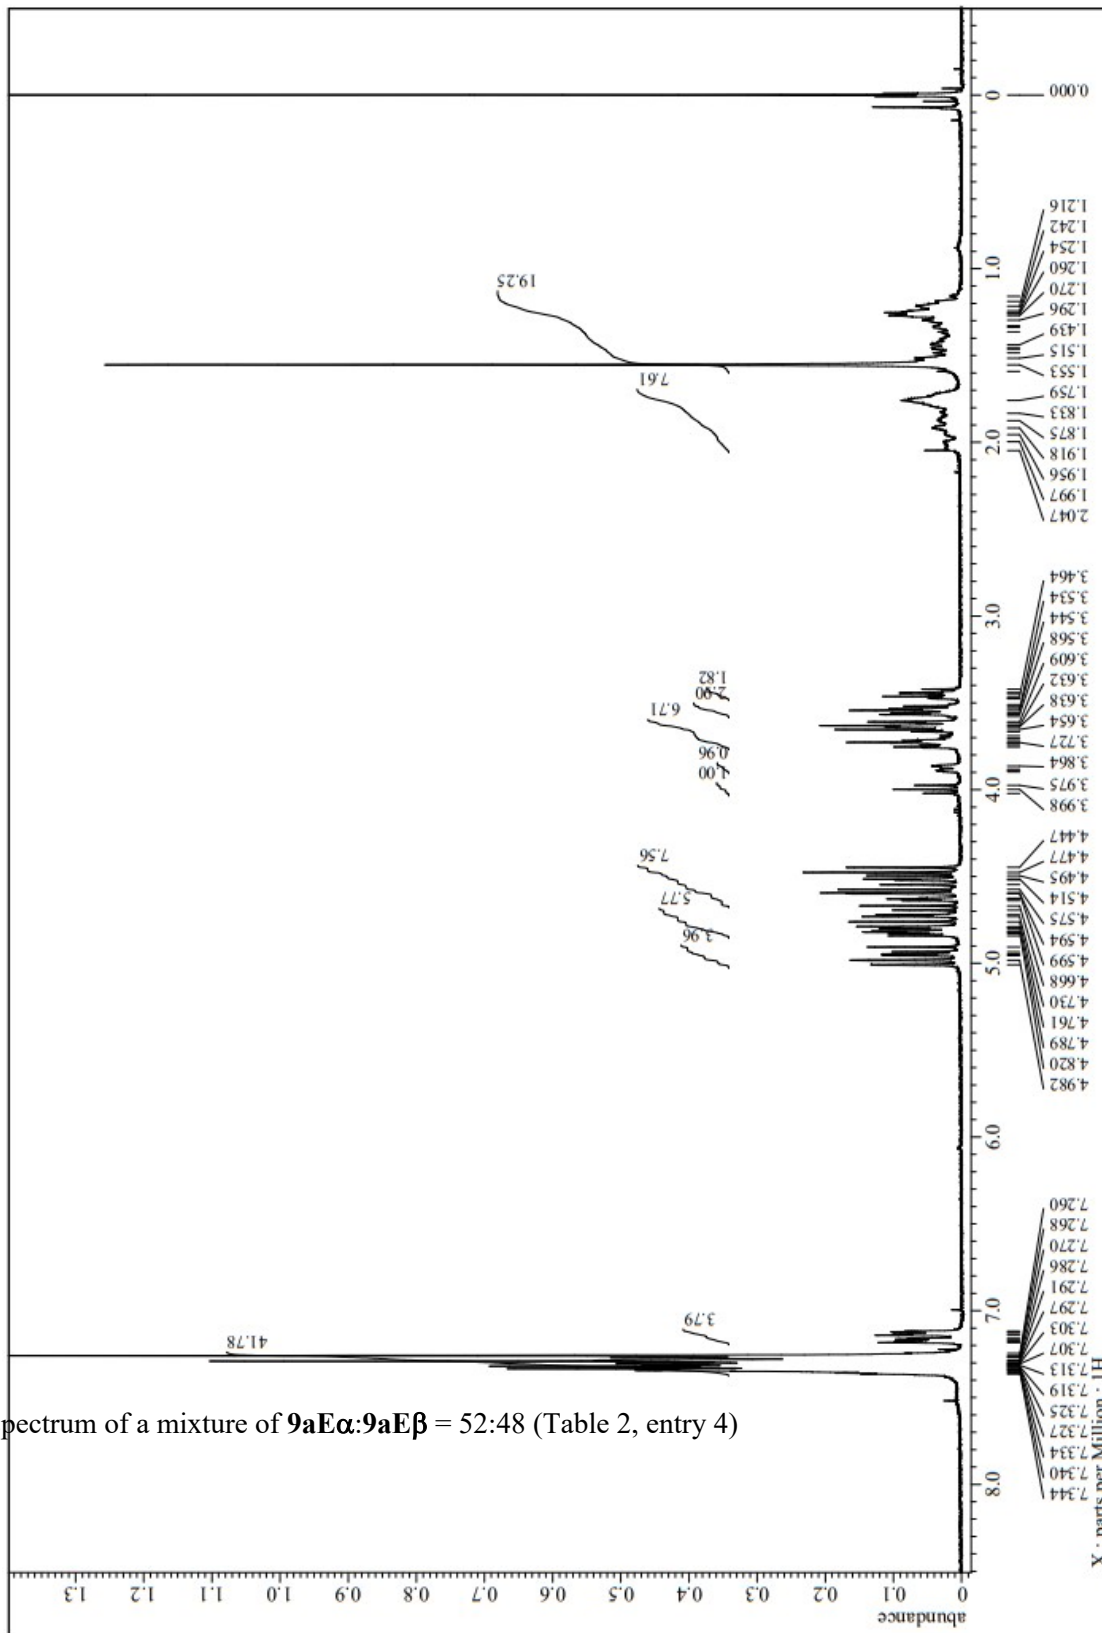

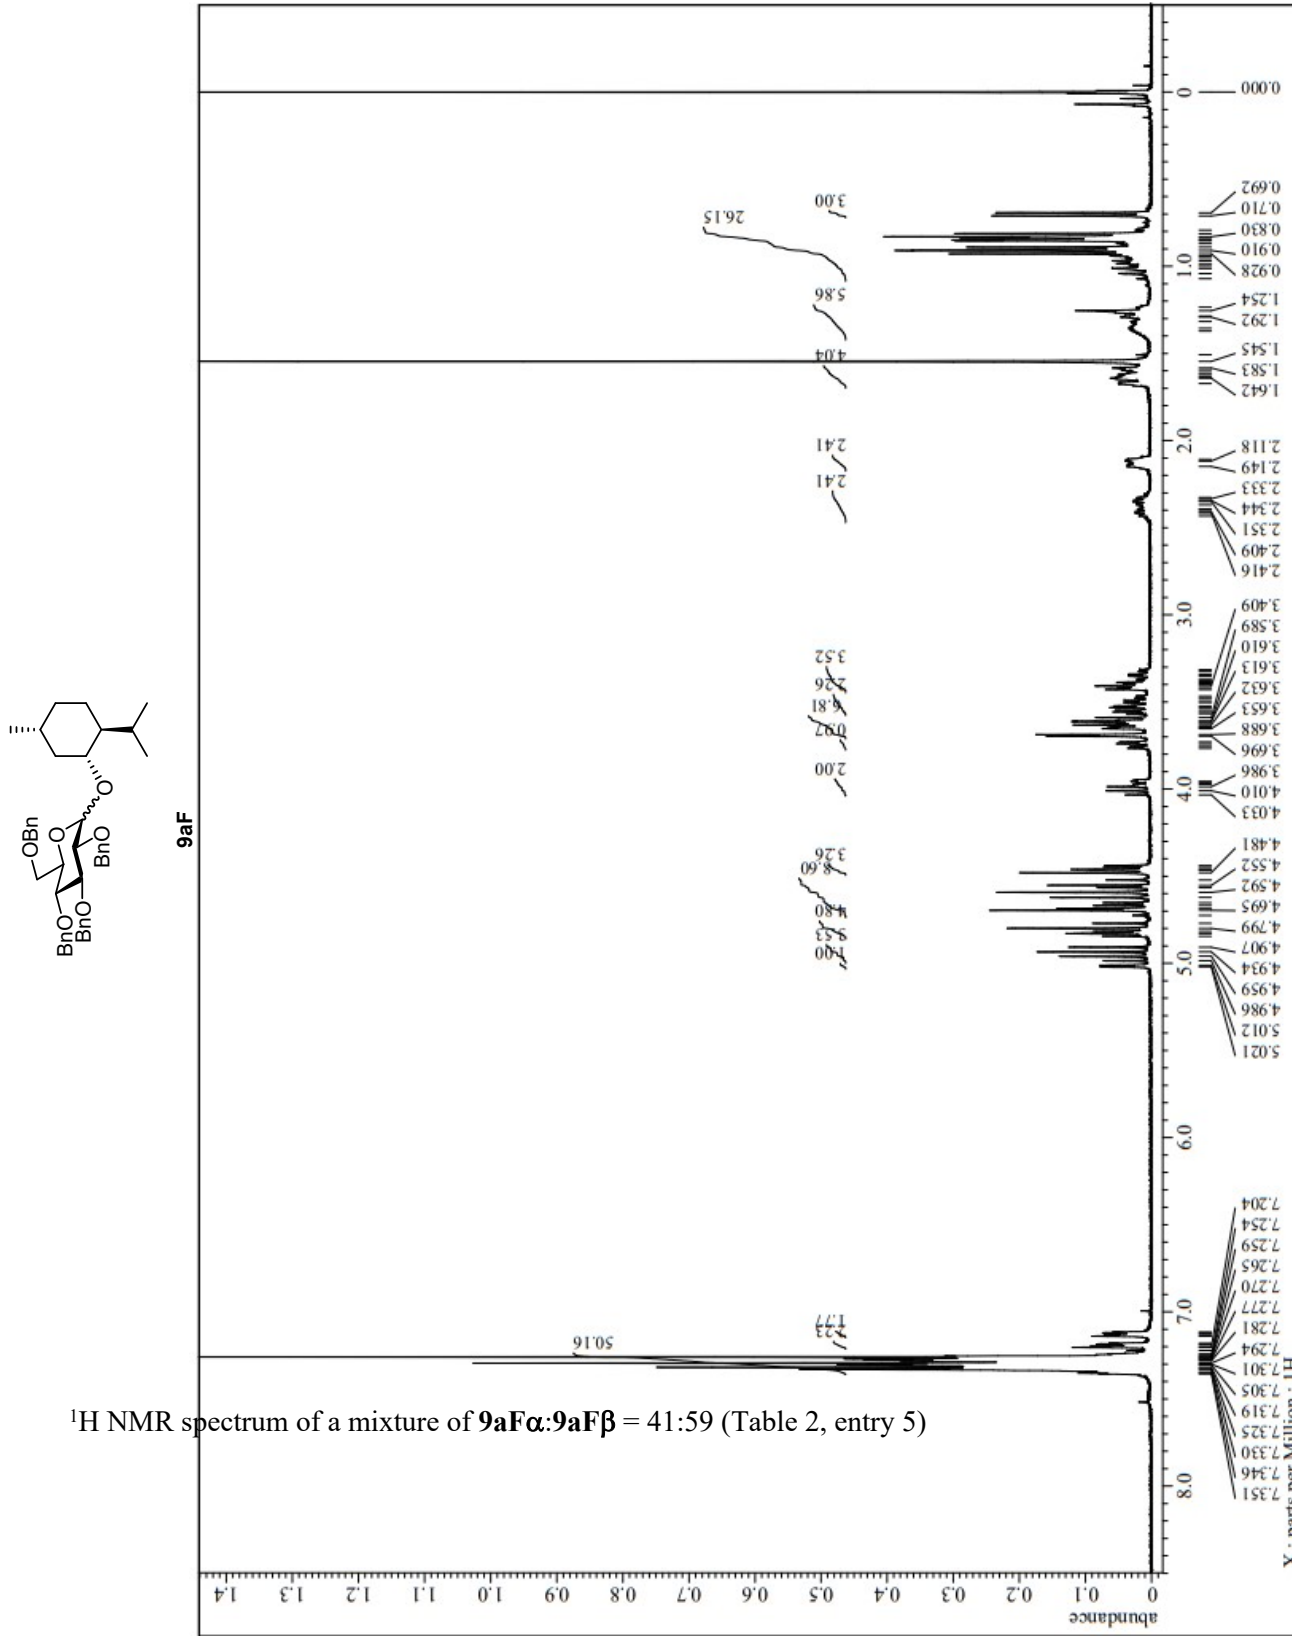



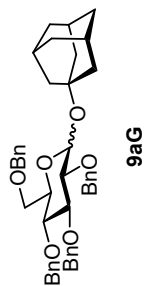

$^1\text{H}$  NMR spectrum of a mixture of **9aG $\alpha$** :**9aG $\beta$**  = 49:51 (Table 2, entry 6)

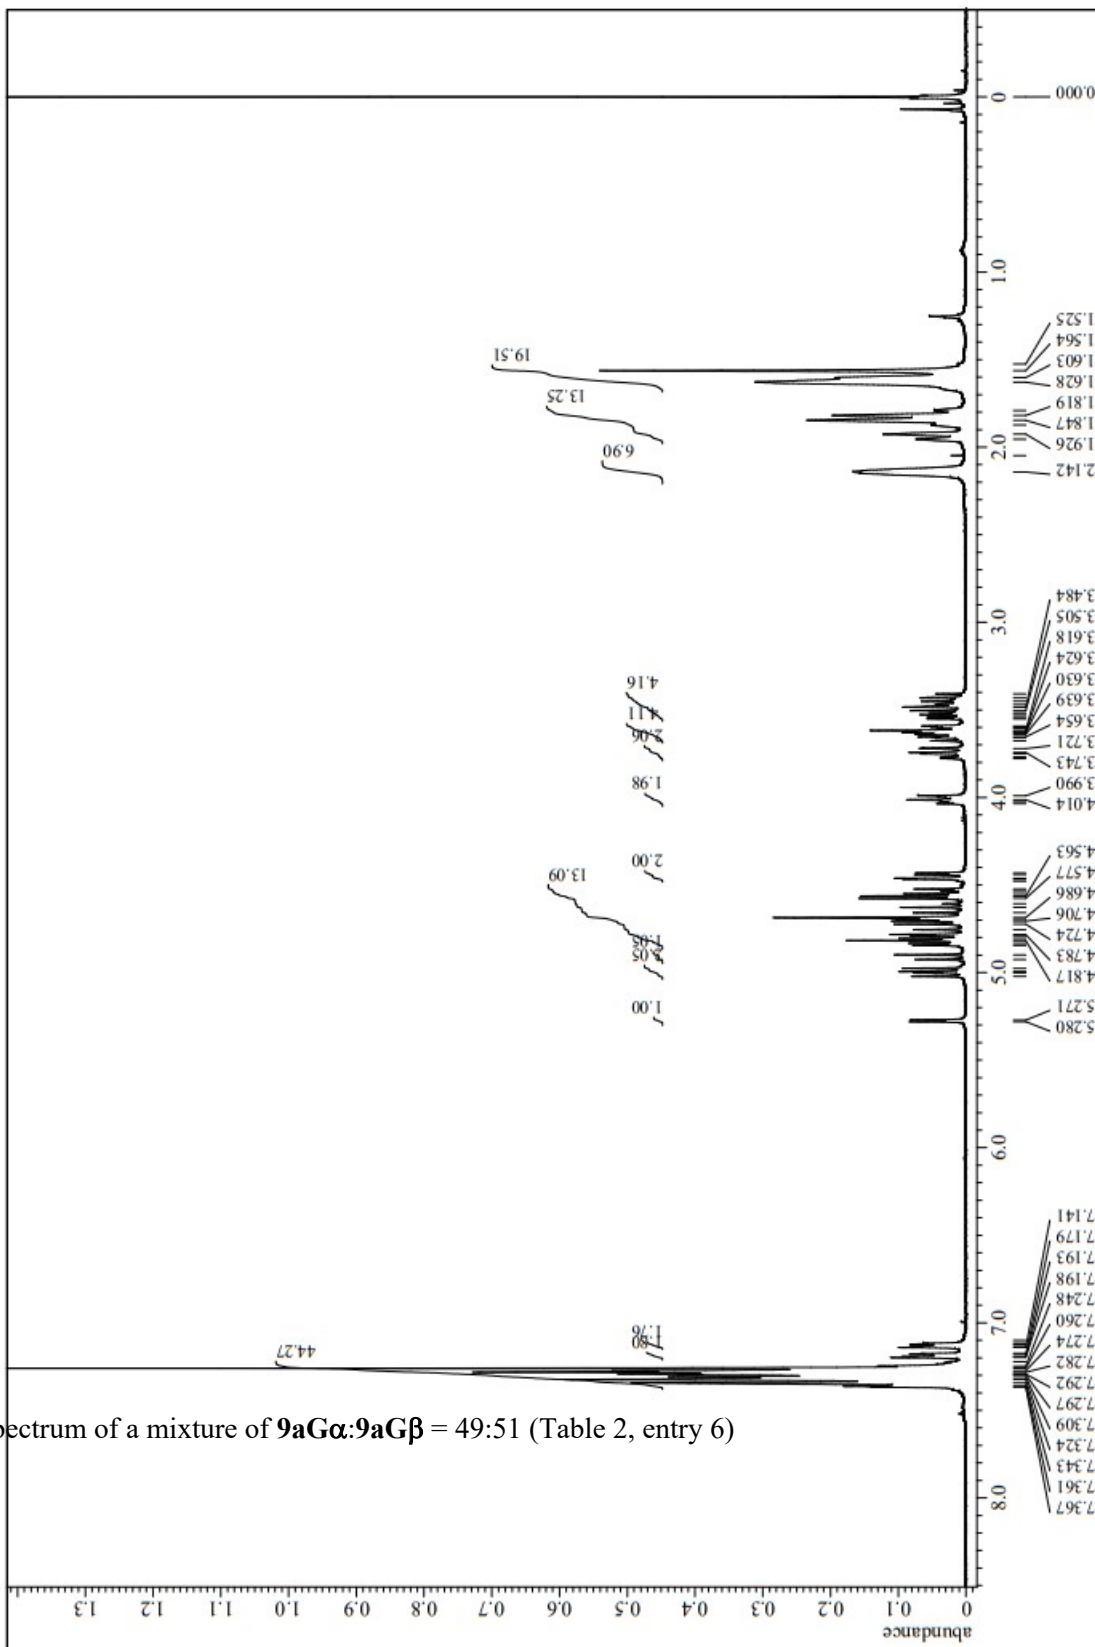

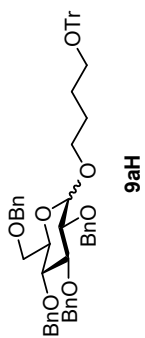

$^1\text{H}$  NMR spectrum of a mixture of **9aH $\alpha$** :**9aH $\beta$**  = 41:59 (Table 2, entry 7)

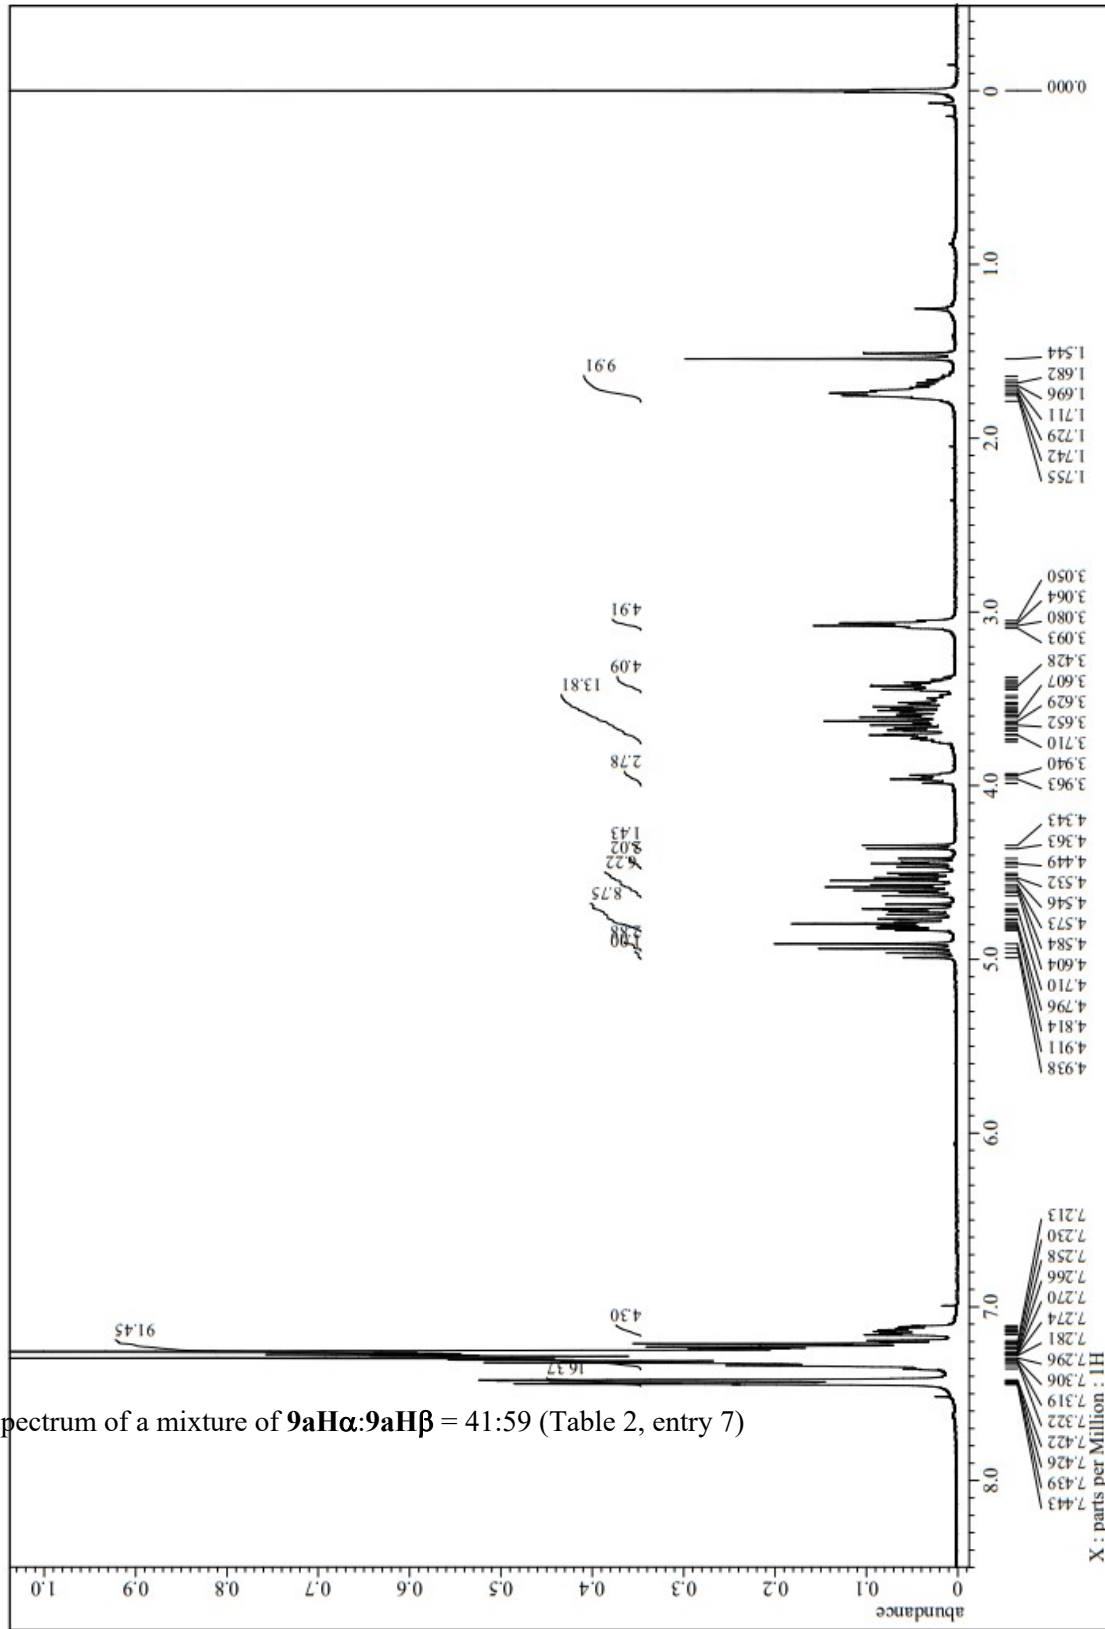

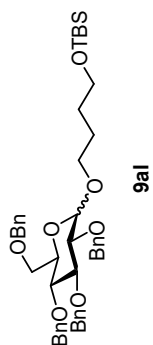

$^1\text{H}$  NMR spectrum of a mixture of **9aI $\alpha$** :**9aI $\beta$**  = 44:56 (Table 2, entry 8)

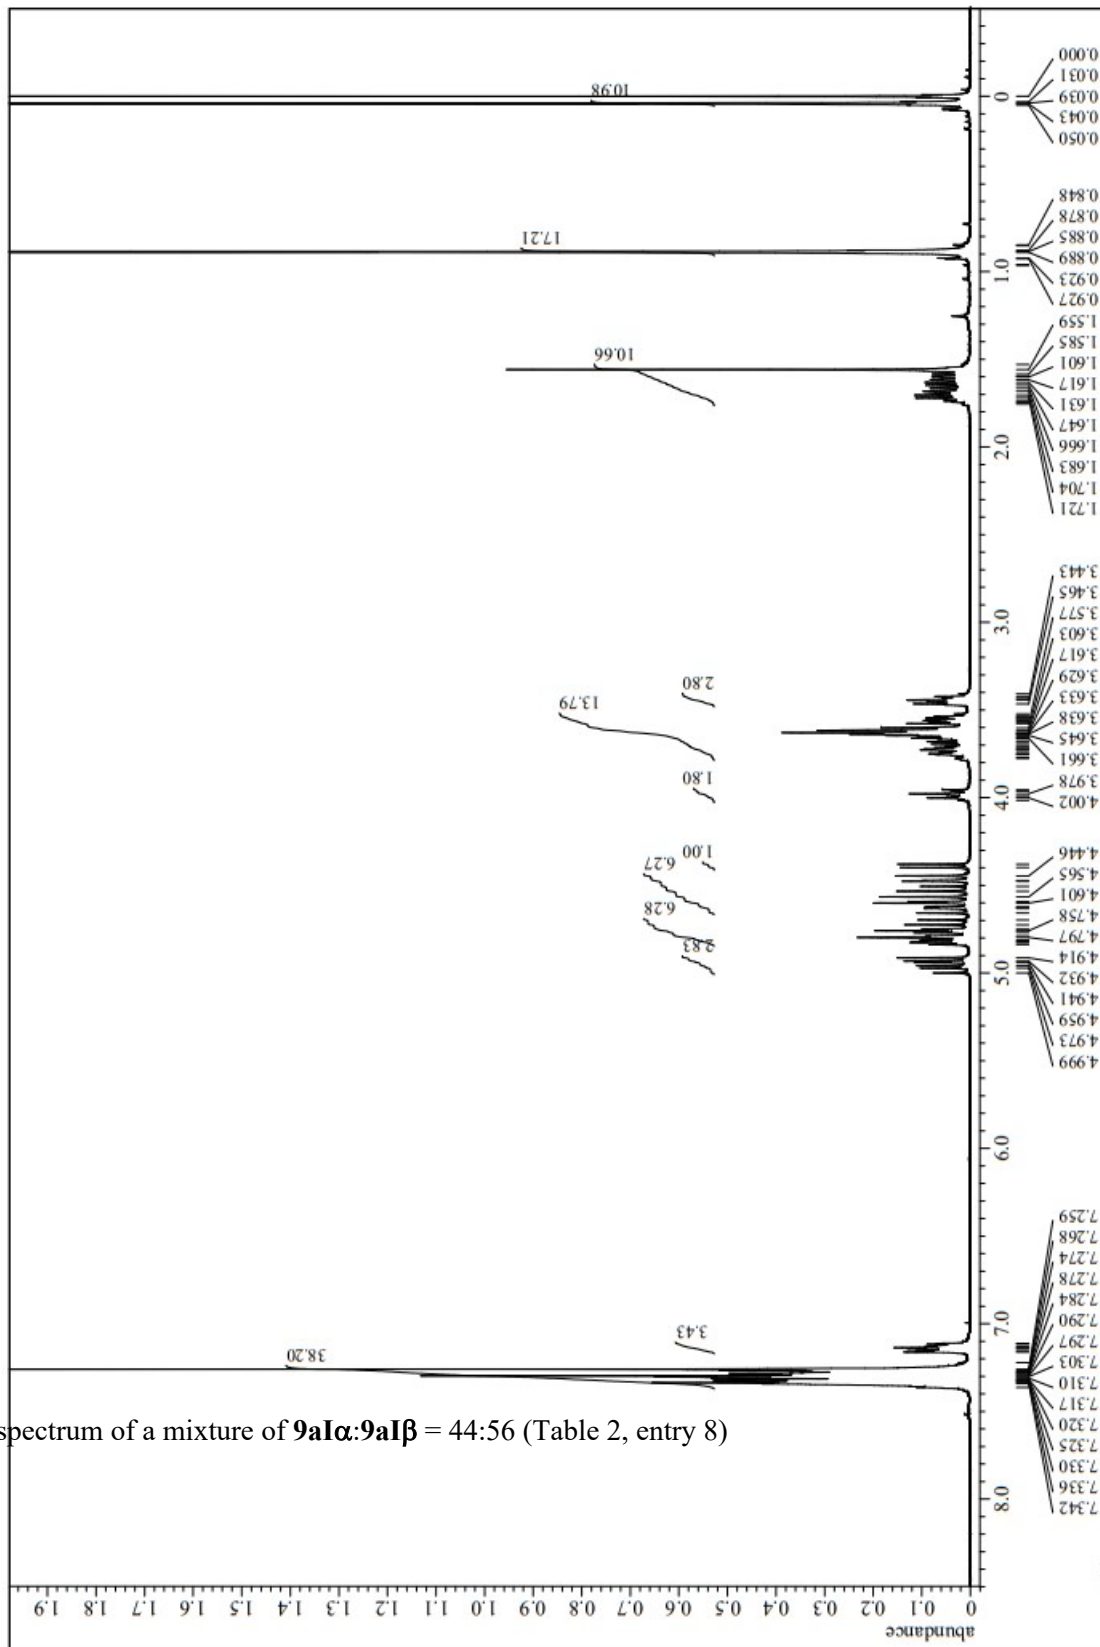

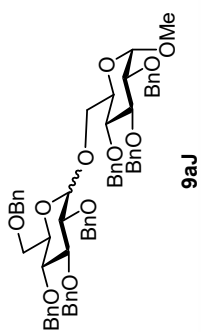

$^1\text{H}$  NMR spectrum of a mixture of **9aJ $\alpha$** :**9aJ $\beta$**  = 34:66 (Table 2, entry 9)

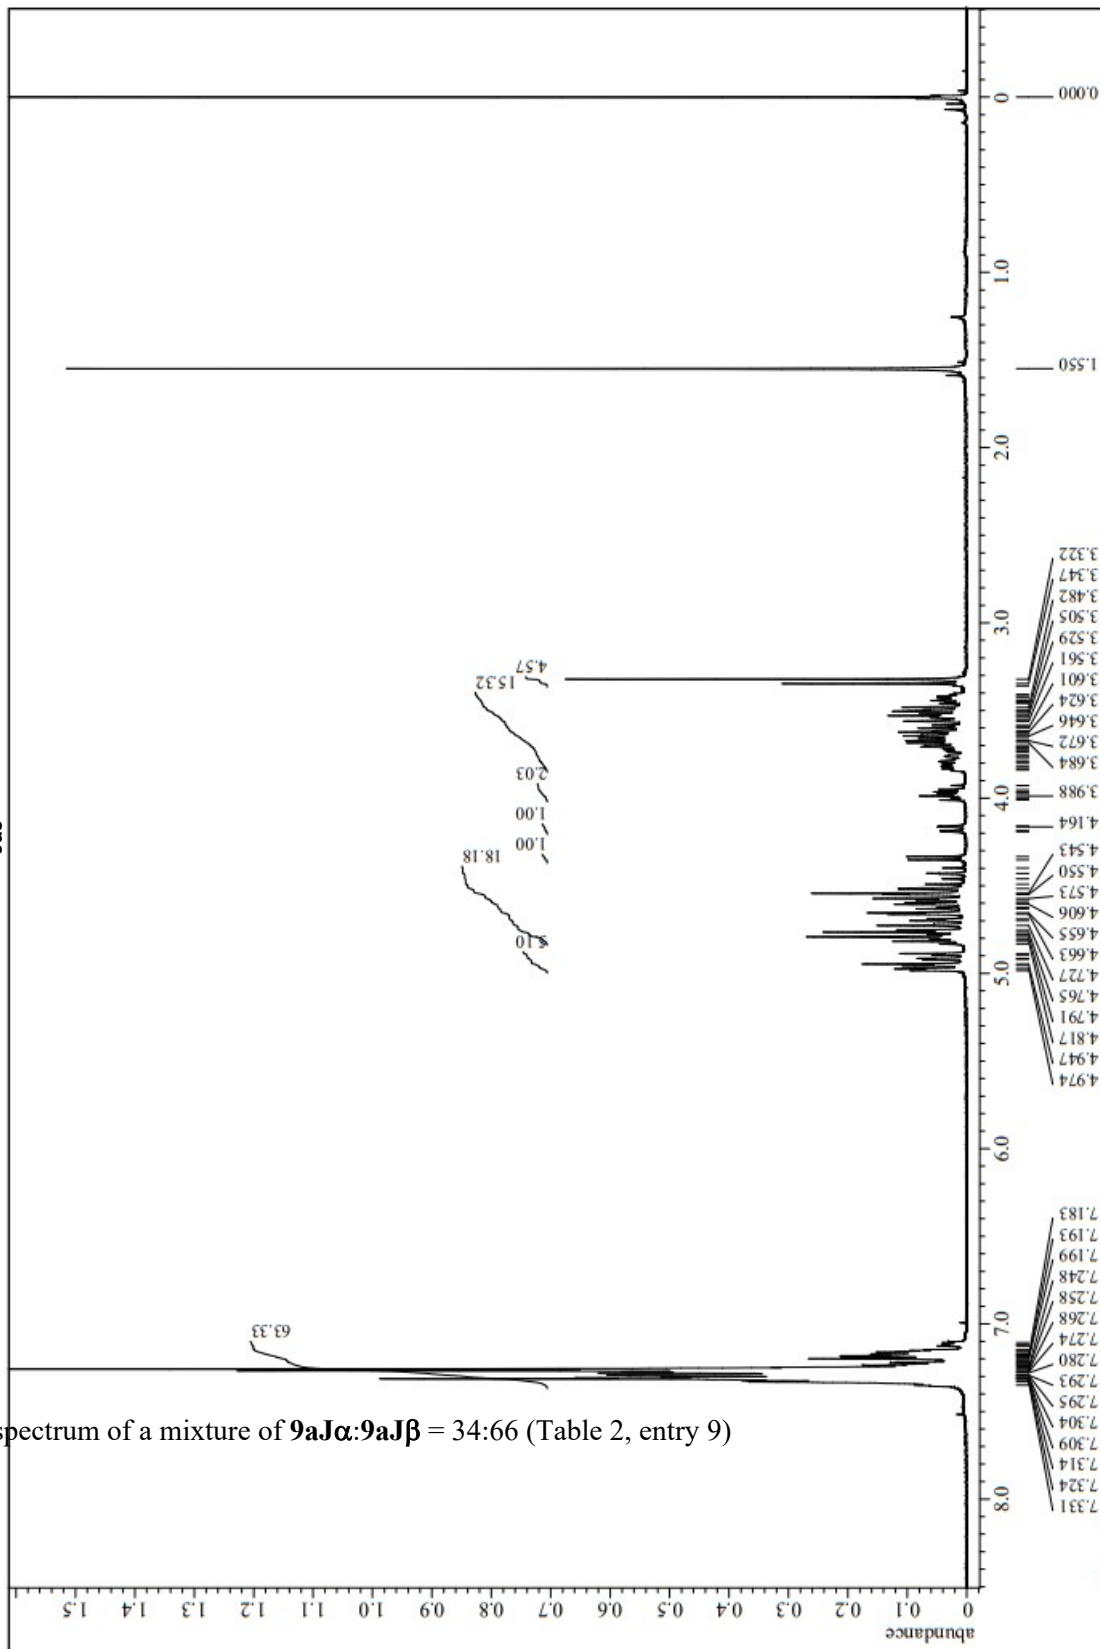

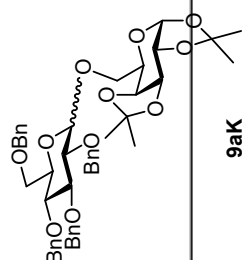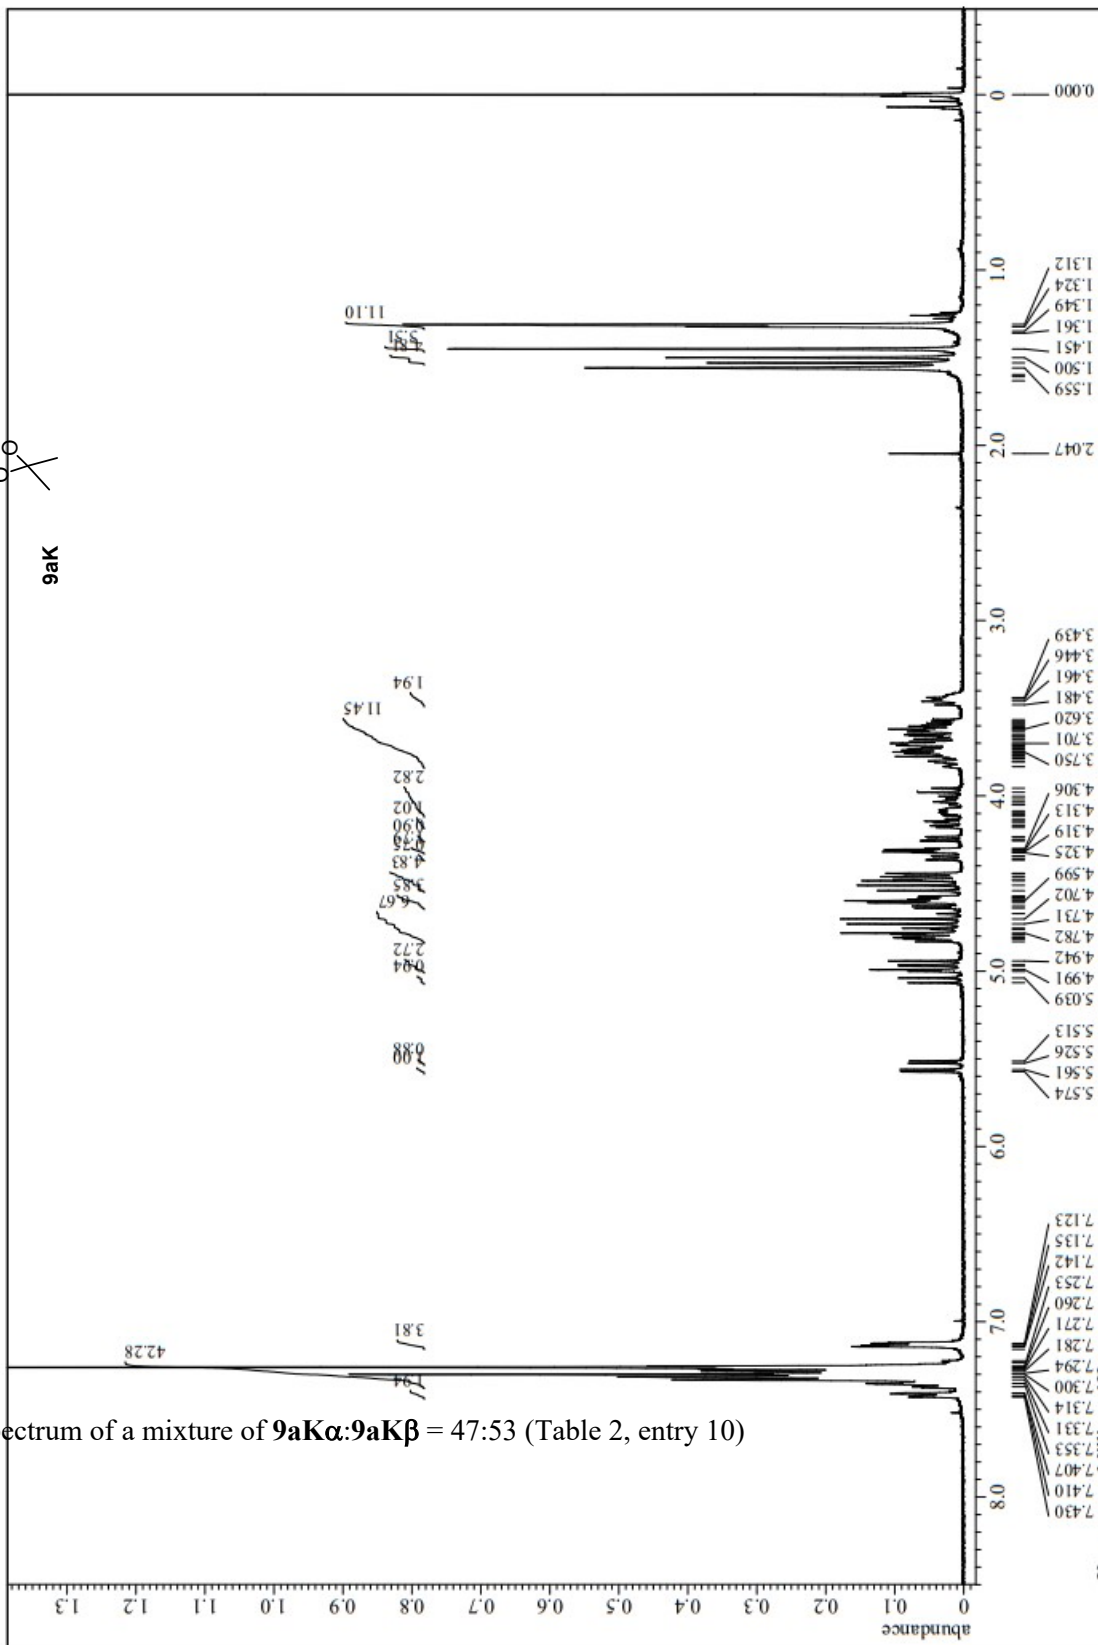

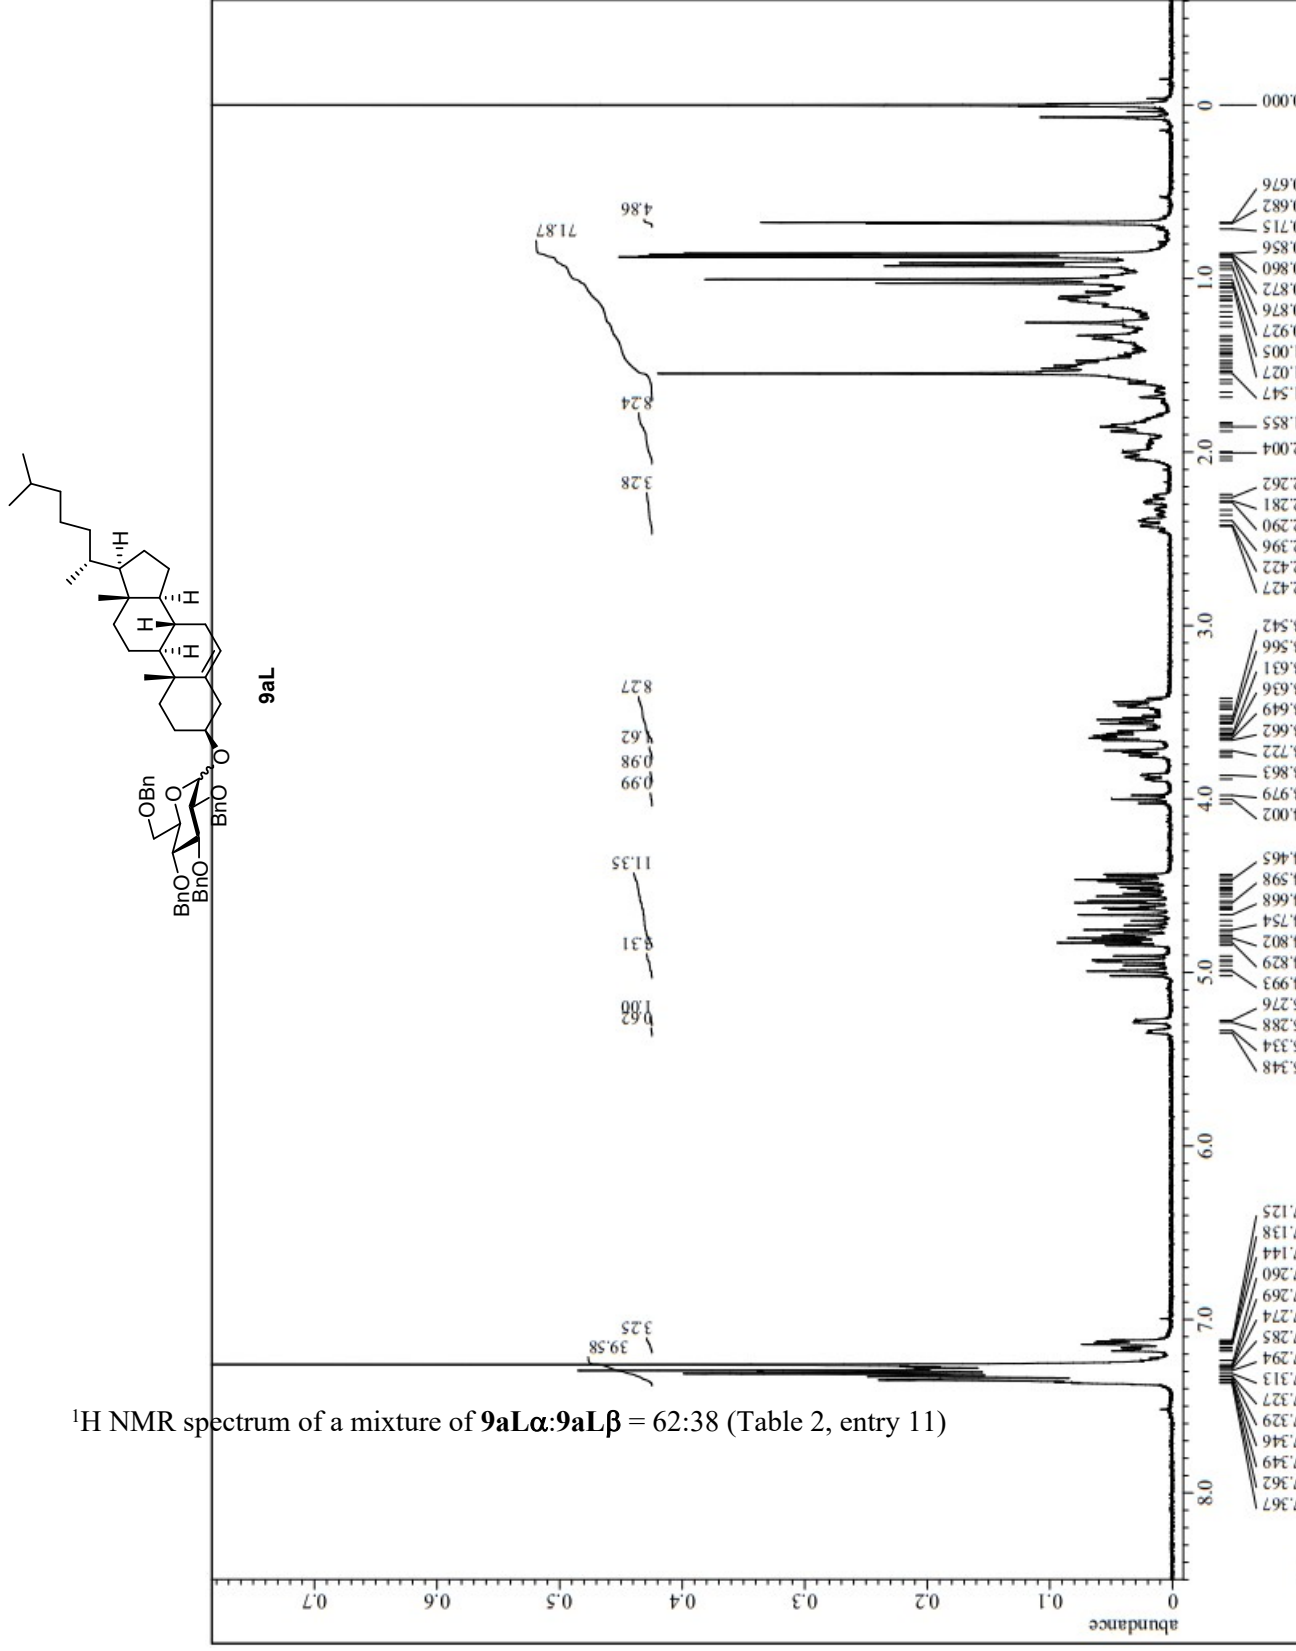

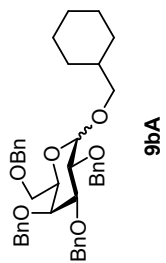

<sup>1</sup>H NMR spectrum of a mixture of **9bA** $\alpha$ :**9bA** $\beta$  = 14:86 (Table 2, entry 12)

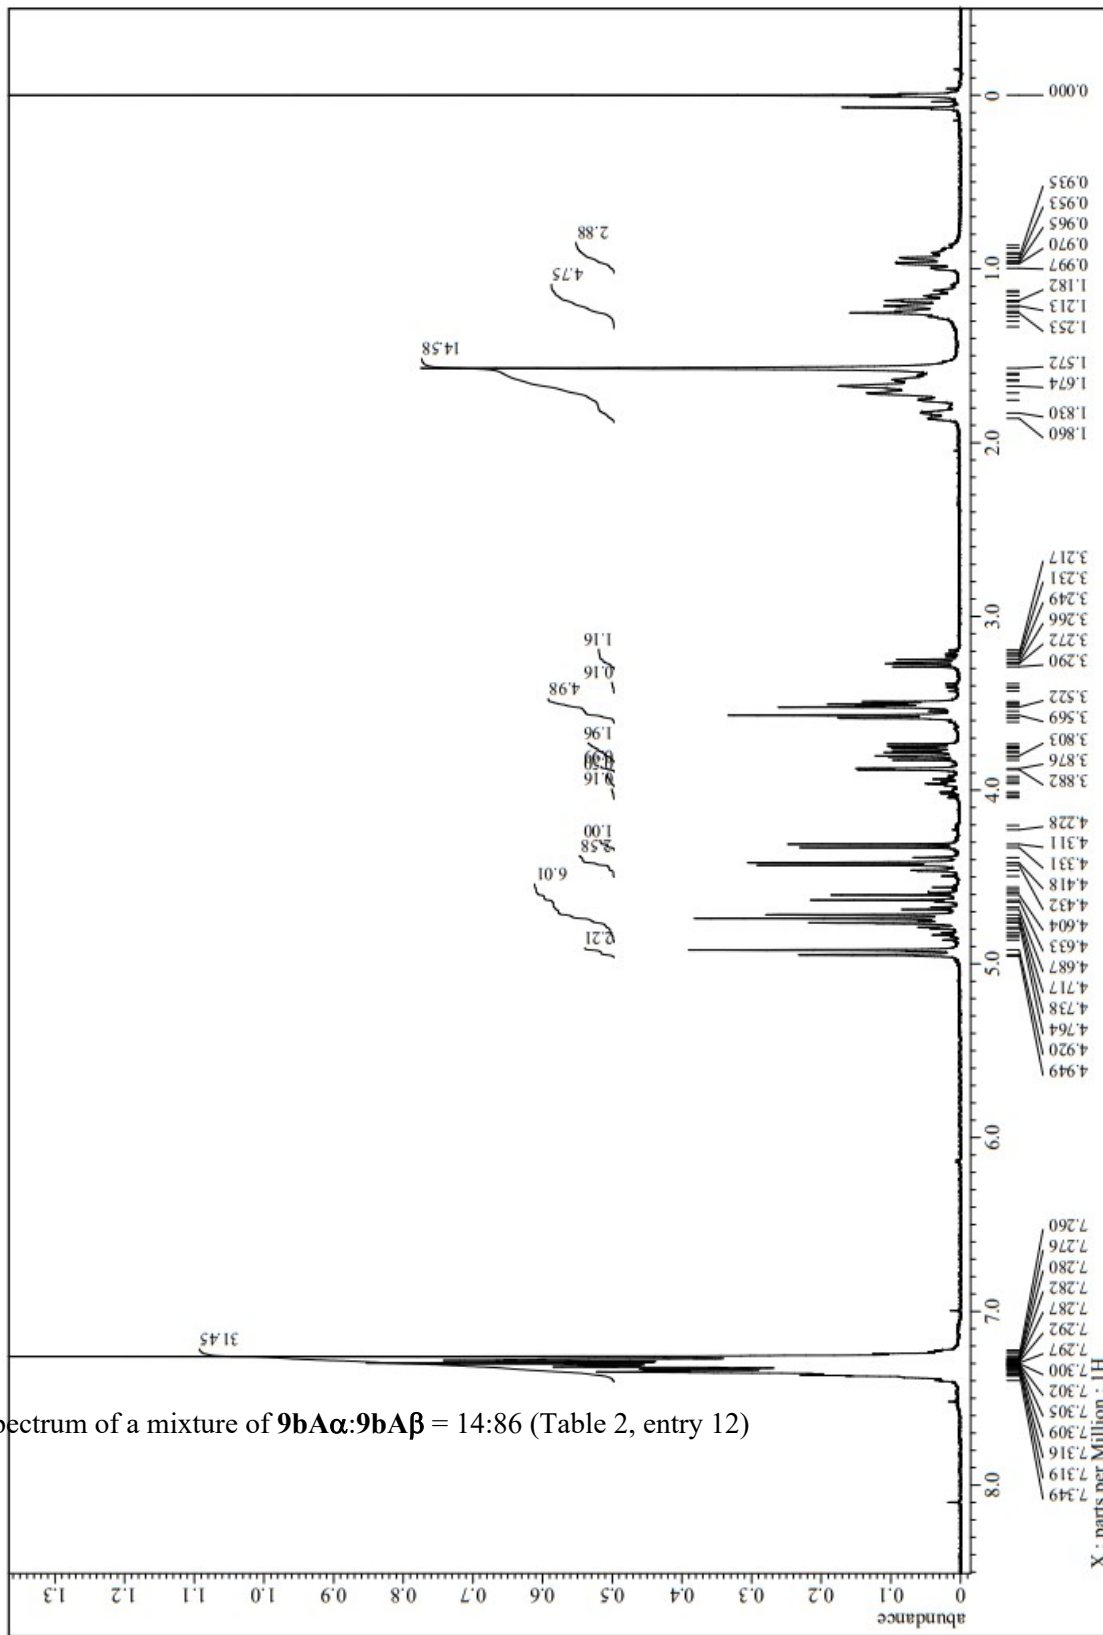

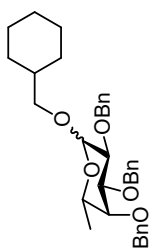

$^1\text{H}$  NMR spectrum of a mixture of 9cA $\alpha$ :9cA $\beta$  = 12:88 (Table 2, entry 13)

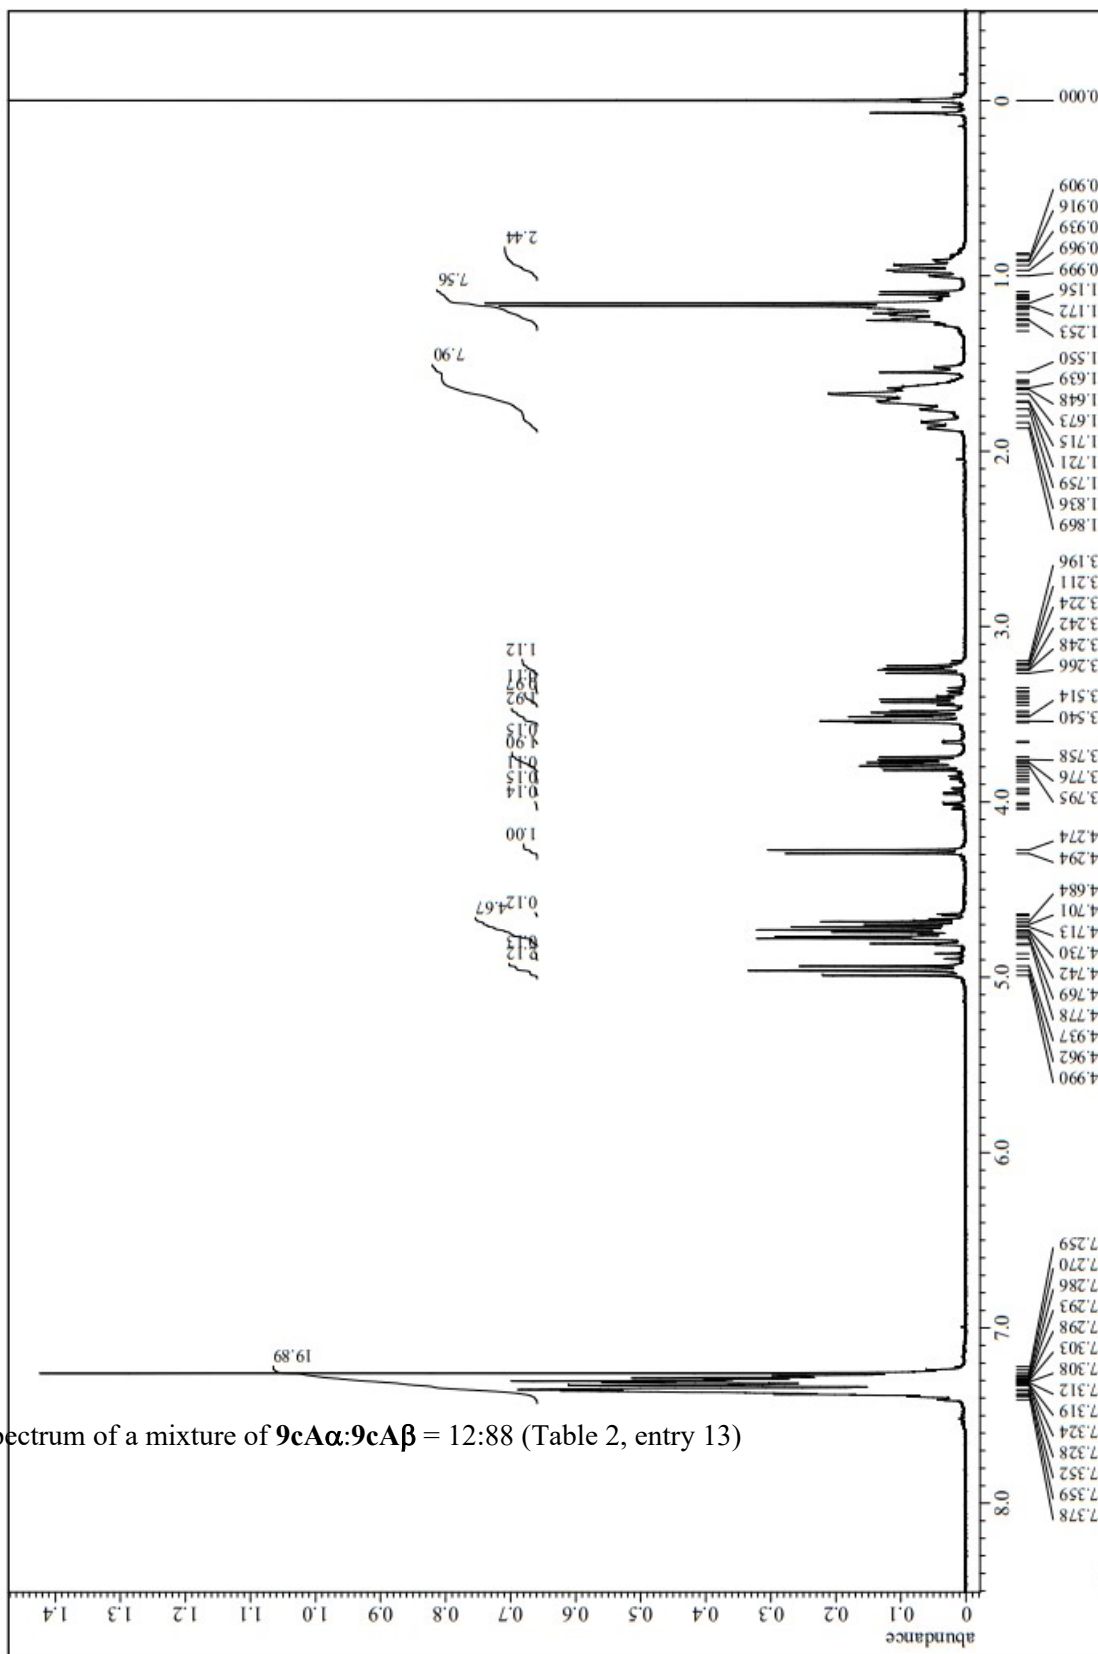



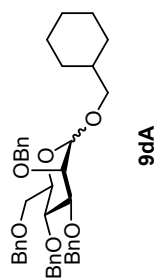

$^1\text{H}$  NMR spectrum of a mixture of **9dA $\alpha$** :**9dA $\beta$**  = 47:53 (Table 2, entry 14)

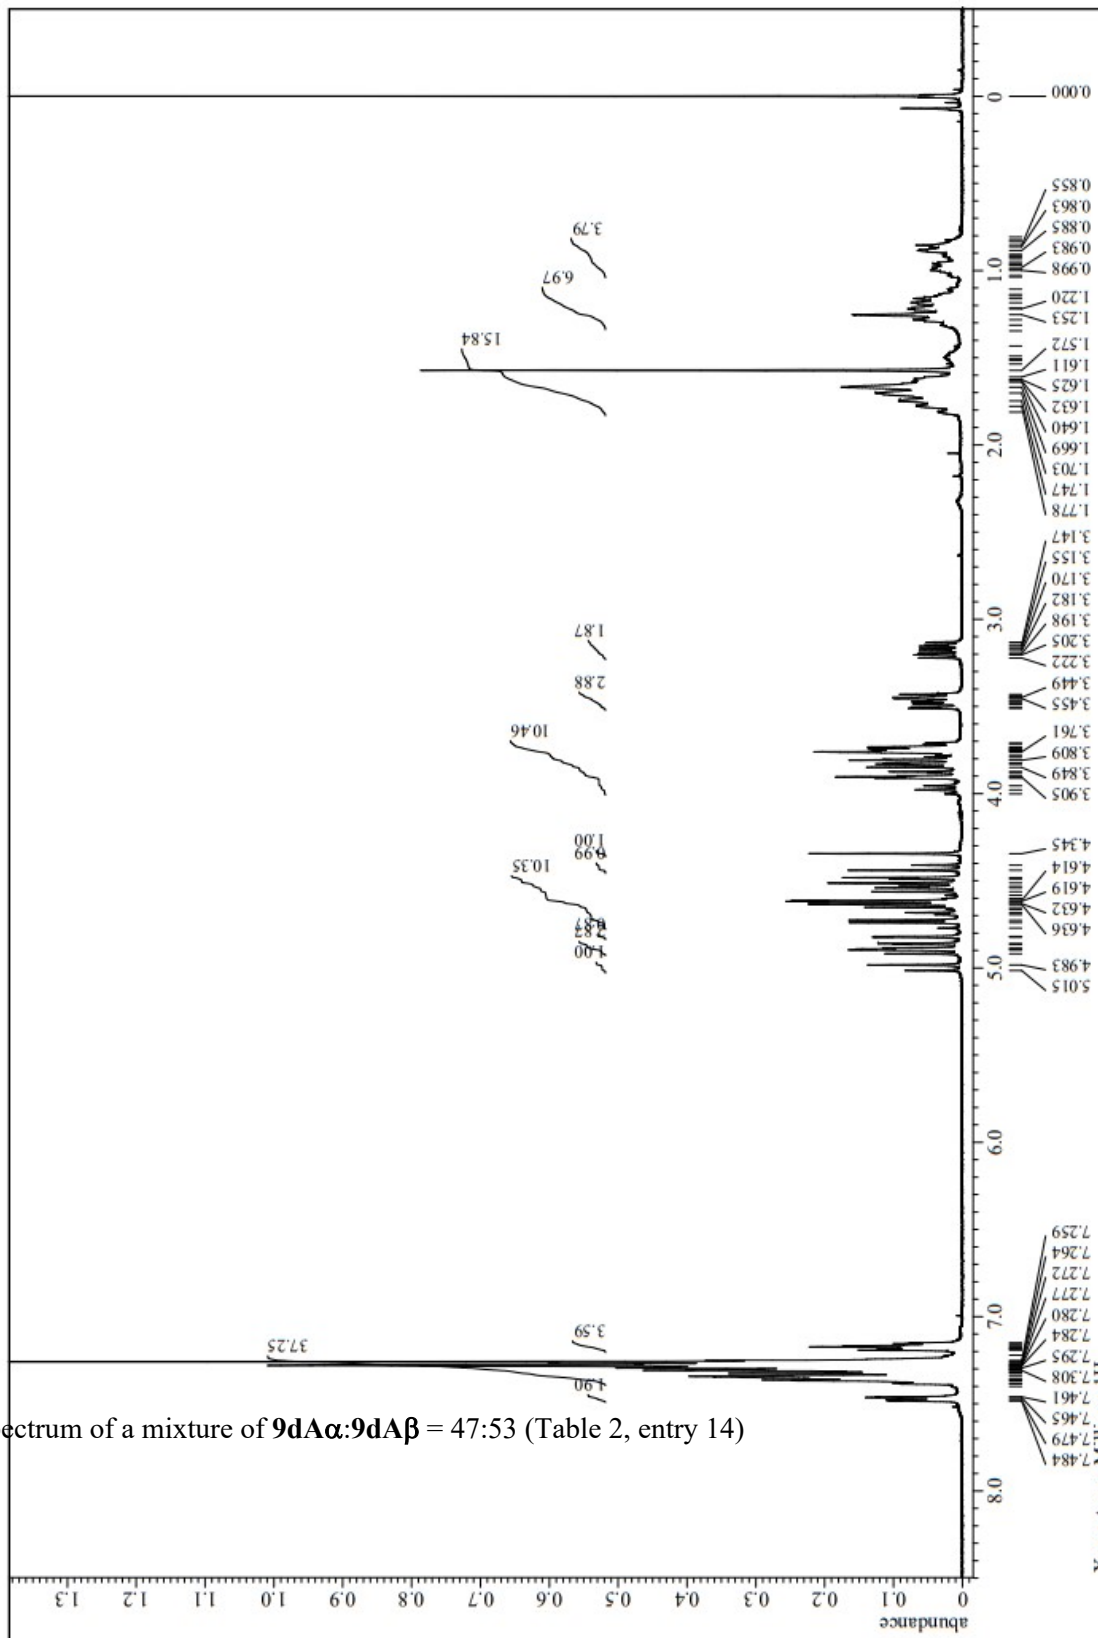

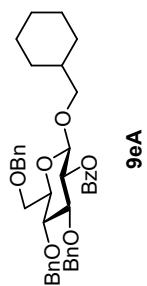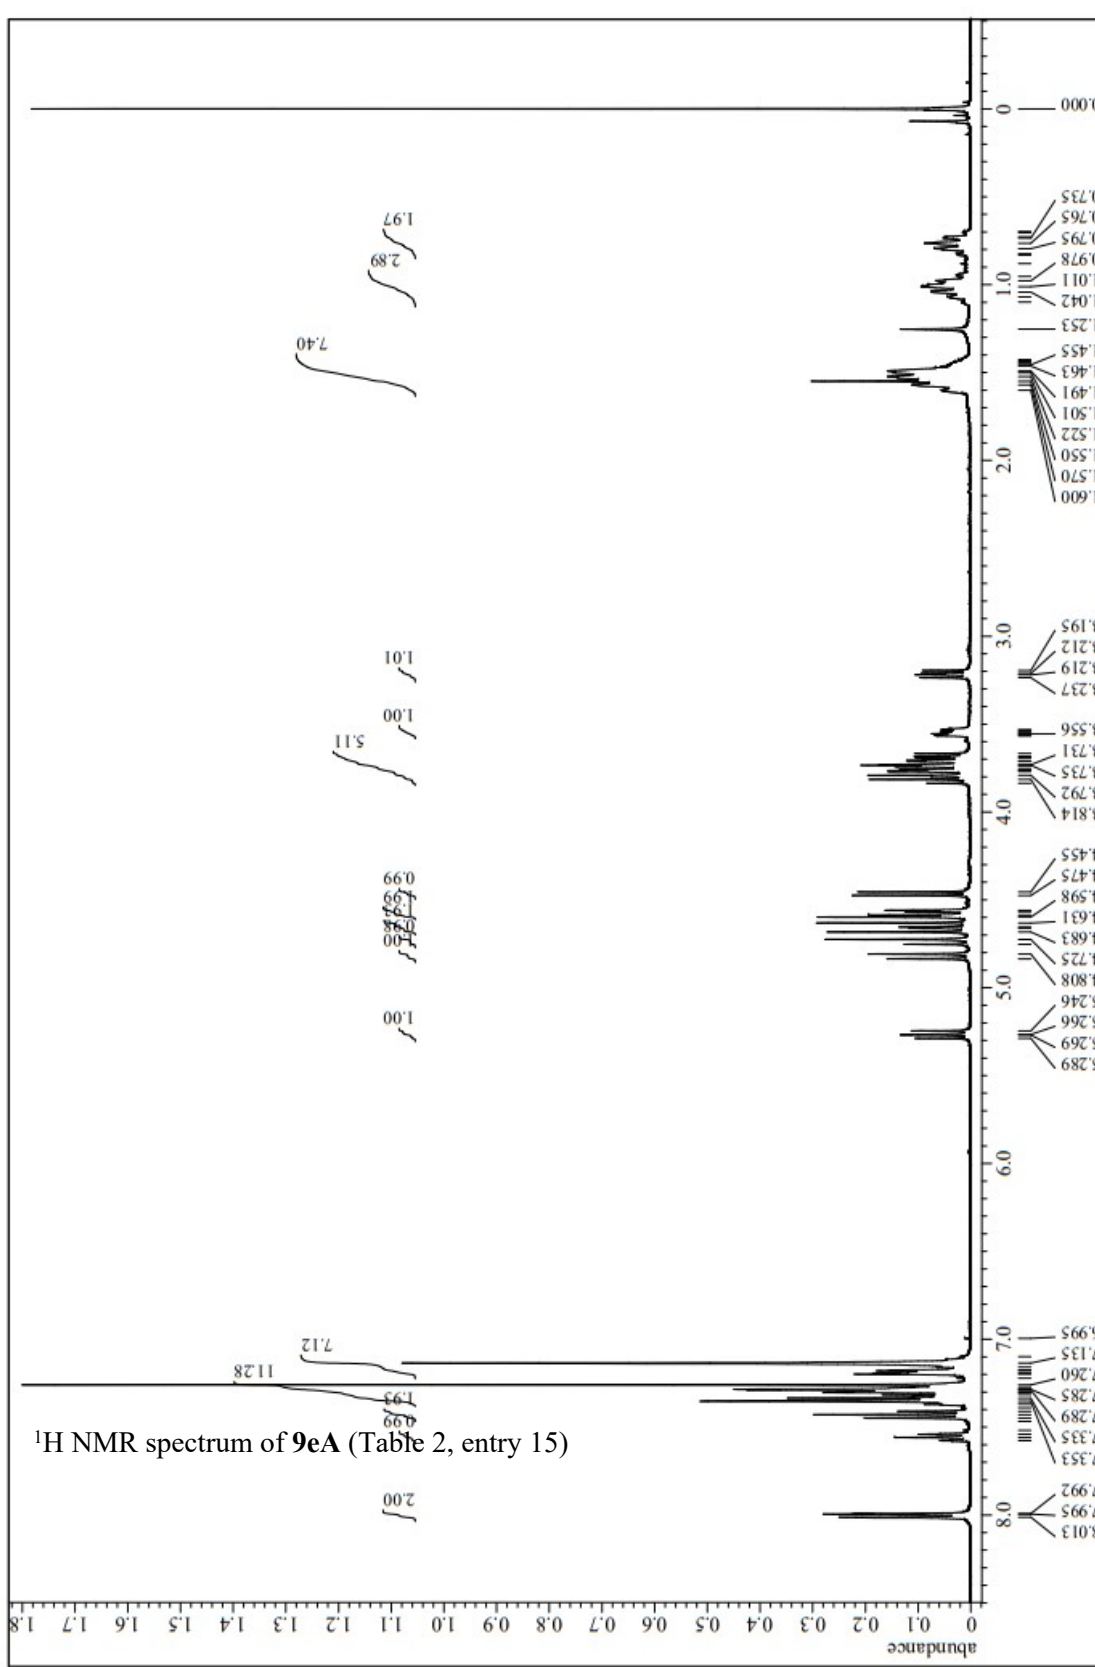

Supplement: d4ob00624k1.pdf [file d4ob00624k1.pdf]
